# Supplementary material for: Microbial Composition in the Duodenum and Ileum of Yellow Broilers With High and Low Feed Efficiency
Source: Front Microbiol. 2021 Jul 27;12:689653. doi: 10.3389/fmicb.2021.689653 (PMC8353196; doi:10.3389/fmicb.2021.689653)
Supplement: Supplementary Table 2 — Difference analysis of relative abundance at phylum and genus levels of part of the microbes in the duodenum and ileum of HFE and LFE groups. [file Table_2.XLSX]

## Sheet: Sheet1
Table S2. Difference analysis of relative abundance at phylum and genus levels of part of the microbes in the duodenum and ileum of HFE and LFE groups
Taxa	Intestinal segment	Microbe	HFE group (%)	LFE group (%)	P value	FDR
Phylum	Duodenum	Firmicutes	81.068 ± 20.210	80.515 ± 18.476	0.585	0.732
		Cyanobacteria	9.748 ± 18.625	13.687 ± 18.377	0.072	0.512
		Actinobacteria	2.676 ± 2.682	2.237 ± 2.220	0.65	0.732
		Proteobacteria	2.629 ± 3.471	1.657 ± 2.207	0.114	0.512
		Bacteroidetes	2.243 ± 4.478	0.867 ± 1.752	0.052	0.512
		Tenericutes	1.043 ± 2.312	0.369 ± 0.470	0.436	0.682
		Thermi	0.356 ± 0.574	0.474 ± 1.488	0.493	0.682
	Ileum	Firmicutes	86.669 ± 16.493	91.412 ± 8.371	0.65	0.689
		Proteobacteria	8.117 ± 13.266	4.896 ± 7.584	0.493	0.633
		Cyanobacteria	2.203 ± 3.752	1.545 ± 1.861	0.65	0.689
		Actinobacteria	1.048 ± 1.470	1.626 ± 2.385	0.553	0.664
		Bacteroidetes	1.011 ± 2.474	0.384 ± 1.171	0.049*	0.125
		Thermi	0.385 ± 0.759	0.042 ± 0.058	0.031*	0.113
		Tenericutes	0.253 ± 0.534	0.078 ± 0.210	0.026*	0.113
Genus	Duodenum	Lactobacillus	49.746 ± 27.634	53.088 ± 30.571	0.617	0.786
		Faecalibacterium	5.328 ± 5.712	6.074 ± 6.854	0.935	1
		Ruminococcus	3.938 ± 4.206	3.051 ± 3.263	0.449	0.66
		Oscillospira	1.634 ± 1.659	1.146 ± 1.289	0.322	0.574
		Coprococcus	1.123 ± 1.909	0.533 ± 0.575	0.278	0.574
		Blautia	0.967 ± 1.093	0.783 ± 1.114	0.634	0.802
		Butyricicoccus	0.749 ± 0.759	0.555 ± 0.727	0.3	0.574
		Rothia	0.700 ± 1.311	0.588 ± 0.743	0.409	0.634
		Enterococcus	0.667 ± 1.139	1.592 ± 2.878	0.673	0.827
		Prevotella	0.616 ± 2.863	0.004 ± 0.012	0.116	0.482
		Escherichia	0.485 ± 0.485	0.722 ± 1.449	0.422	0.635
		Bifidobacterium	0.376 ± 0.651	0.466 ± 0.925	0.681	0.827
		Thermus	0.346 ± 0.572	0.470 ± 1.481	0.522	0.744
		Bacteroides	0.182 ± 0.363	0.047 ± 0.099	0.057	0.395
		SMB53	0.038 ± 0.052	0.210 ± 0.634	0.541	0.744
		Enterobacter	0.032 ± 0.050	0.461 ± 1.804	0.769	0.884
	Ileum	Lactobacillus	54.092 ± 36.562	61.280 ± 30.891	0.409	0.488
		SMB53	11.794 ± 21.696	10.748 ± 21.467	0.699	0.756
		Enterococcus	10.414 ± 22.069	8.774 ± 16.156	0.518	0.599
		Escherichia	6.286 ± 12.455	4.224 ± 7.463	0.719	0.769
		Candidatus_Arthromitus	2.530 ± 3.975	1.982 ± 4.805	0.248	0.359
		Faecalibacterium	1.185 ± 1.618	2.001 ± 6.886	0.027*	0.112
		Ruminococcus	0.999 ± 2.534	0.688 ± 1.889	0.042*	0.128
		Rothia	0.528 ± 1.048	1.032 ± 1.935	0.538	0.614
		Bacteroides	0.436 ± 1.248	0.047 ± 0.178	0.129	0.257
		Thermus	0.379 ± 0.753	0.042 ± 0.058	0.031*	0.124
		Oscillospira	0.357 ± 0.596	0.399 ± 1.150	0.045*	0.131
		Coprococcus	0.185 ± 0.369	0.081 ± 0.193	0.036*	0.125
		Blautia	0.182 ± 0.331	0.097 ± 0.219	0.078	0.192
		Enterobacter	0.181 ± 0.549	0.600 ± 2.107	0.84	0.883
		Butyricicoccus	0.155 ± 0.253	0.120 ± 0.313	0.017*	0.096
HFE / LFE: high / low feed efficiency; FDR: false discovery rate; *: P < 0.05.
